# Supplementary material for: Apoptotic brown adipocytes enhance energy expenditure via extracellular inosine
Source: Springer Nature journal article supplement (doi:10.1038/s41586-022-05041-0), 2022-07-05
Supplement: 41586_2022_5041_MOESM1_ESM.pdf [file 41586_2022_5041_MOESM1_ESM.pdf]

---

**Supplementary information**

---

**Apoptotic brown adipocytes enhance energy expenditure via extracellular inosine**

---

In the format provided by the authors and unedited

**a**

P-p38

Calnexin

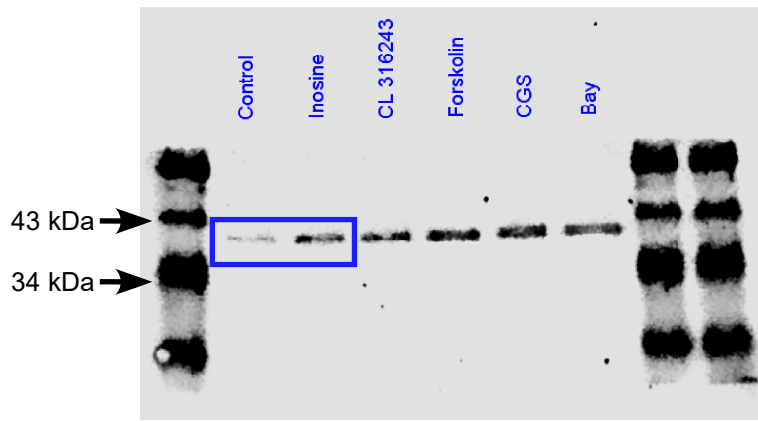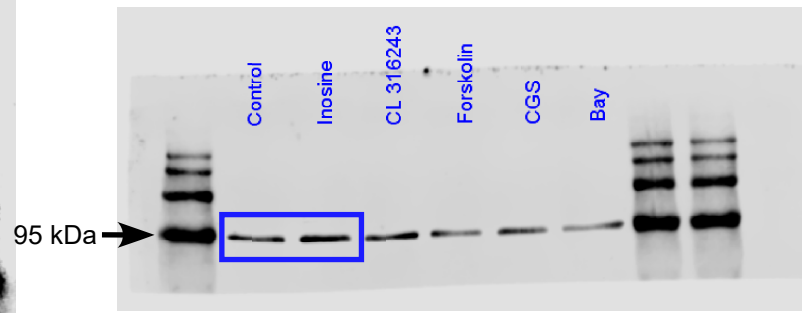**b**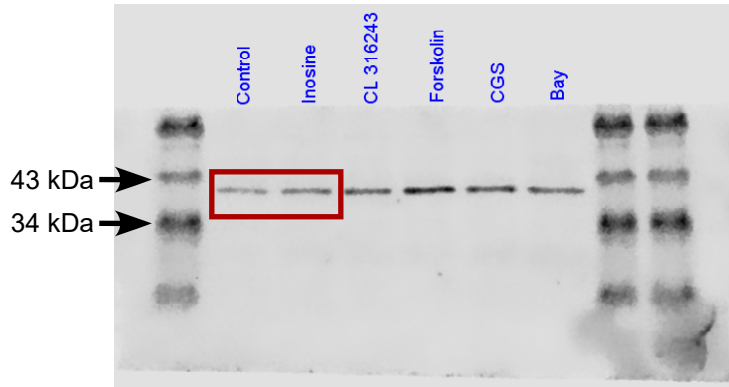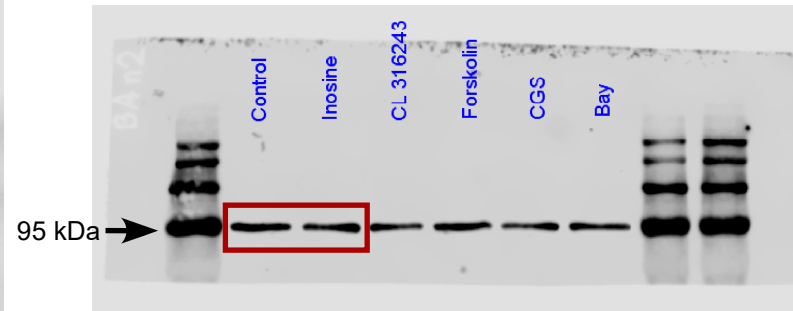**c**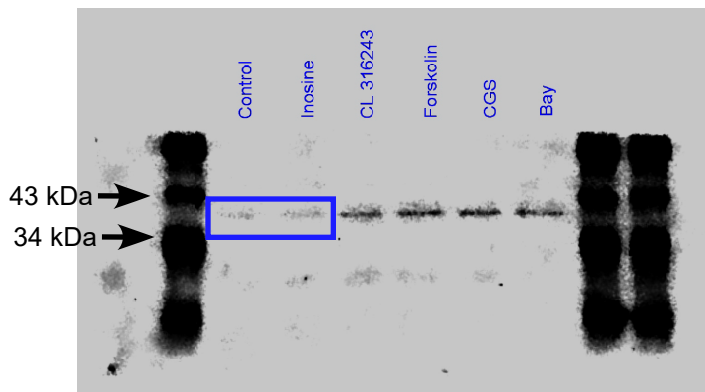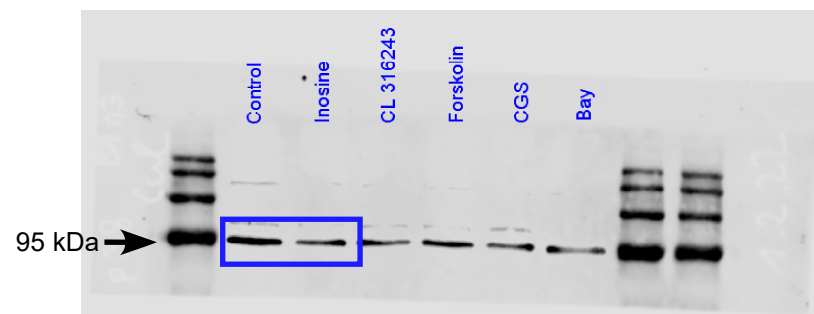

**d**

P-ATF2

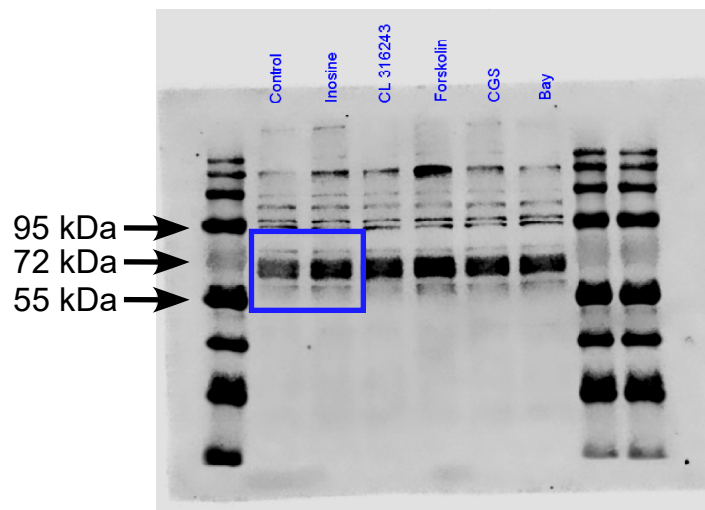

Calnexin

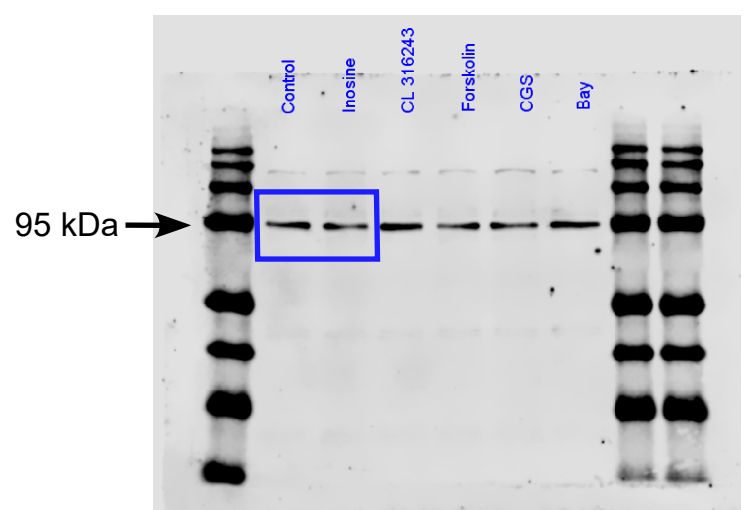**e**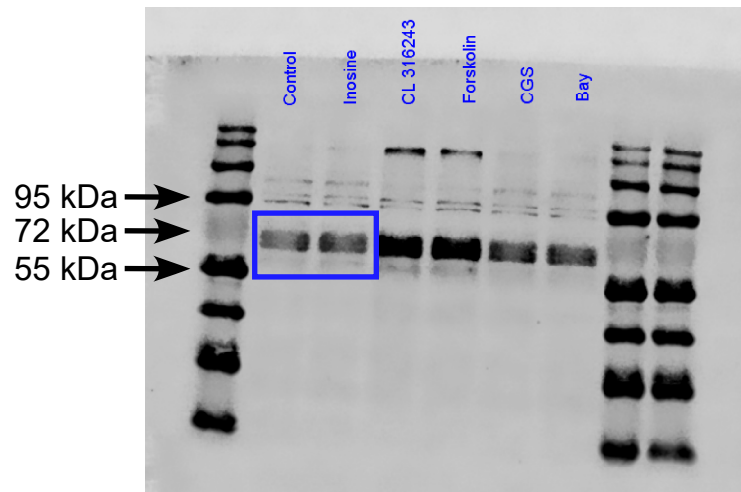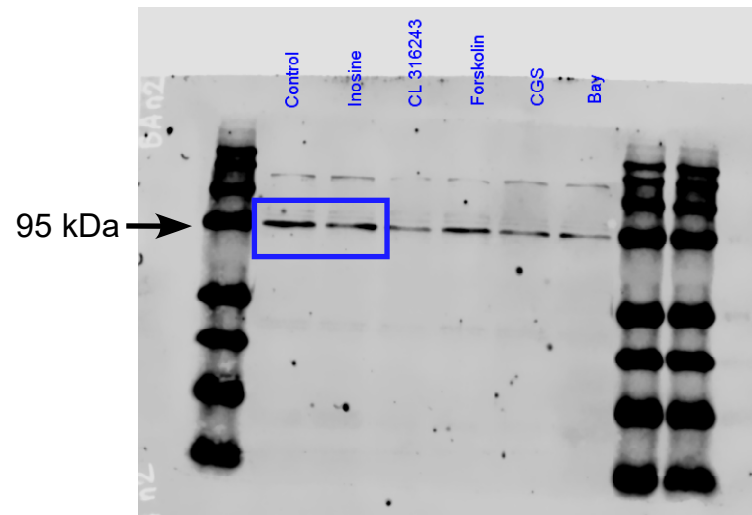**f**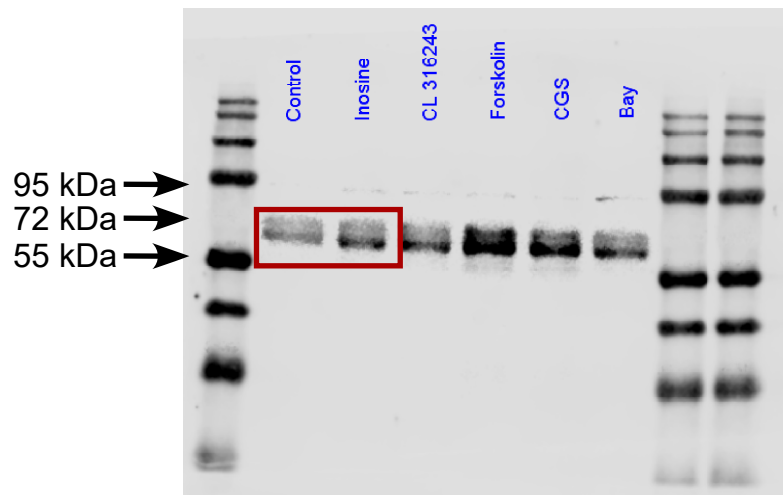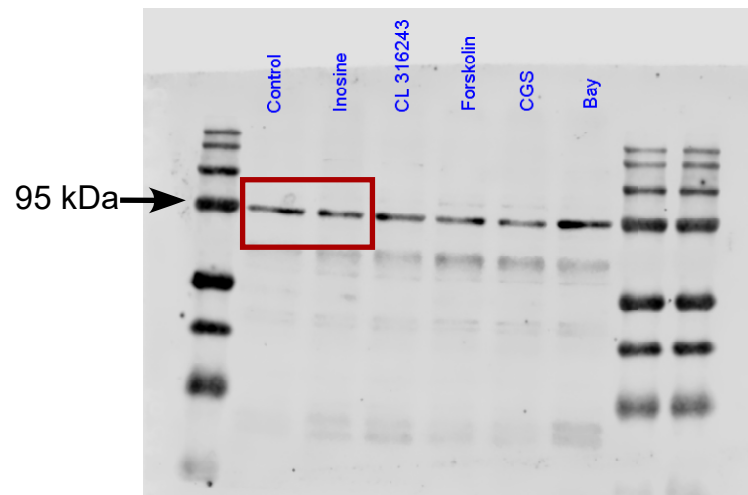

**g**

P-Creb

Calnexin

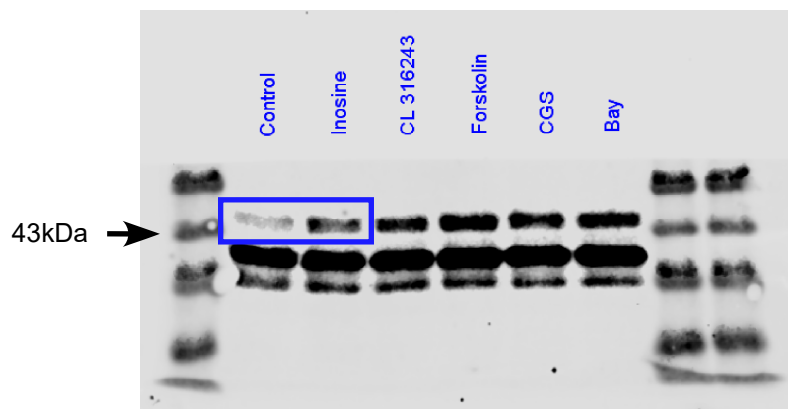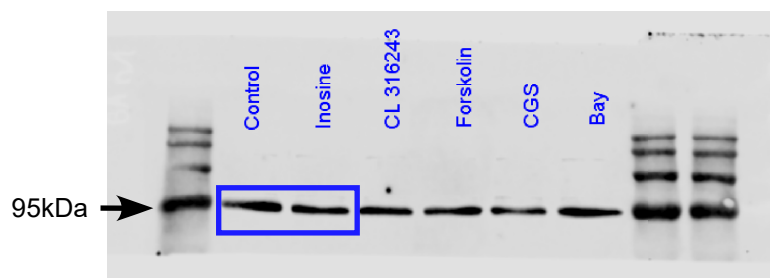**h**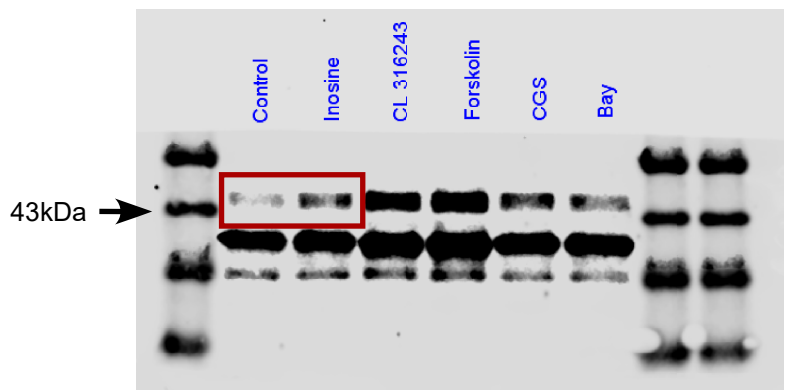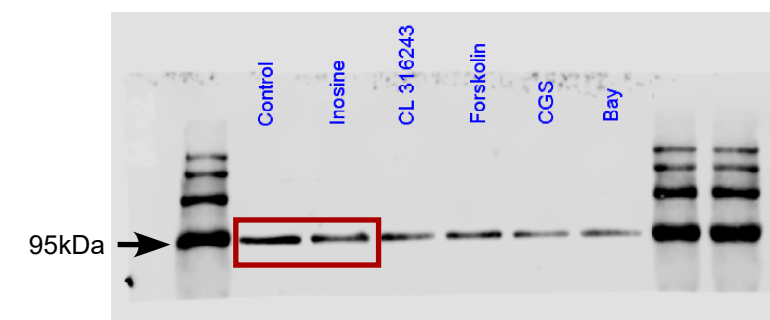**i**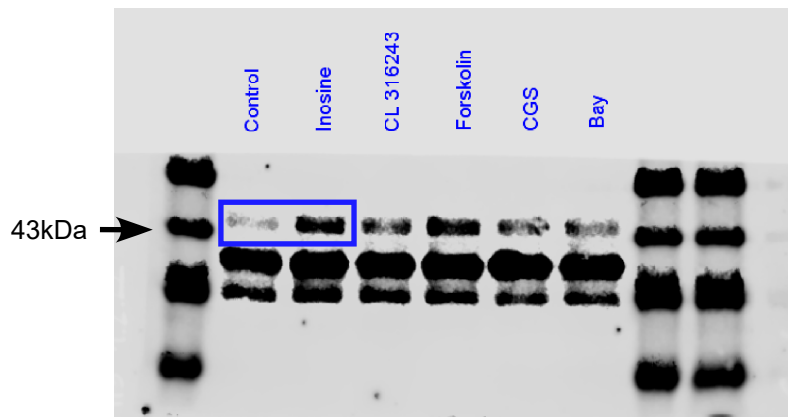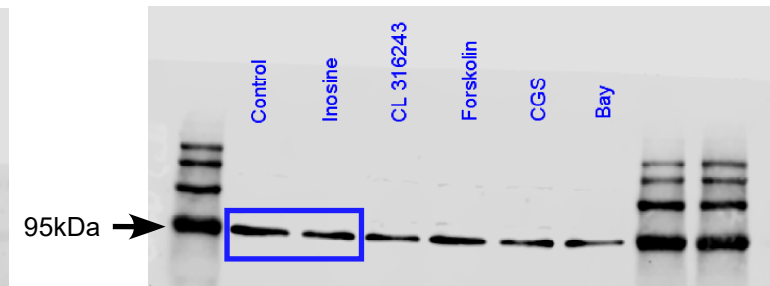



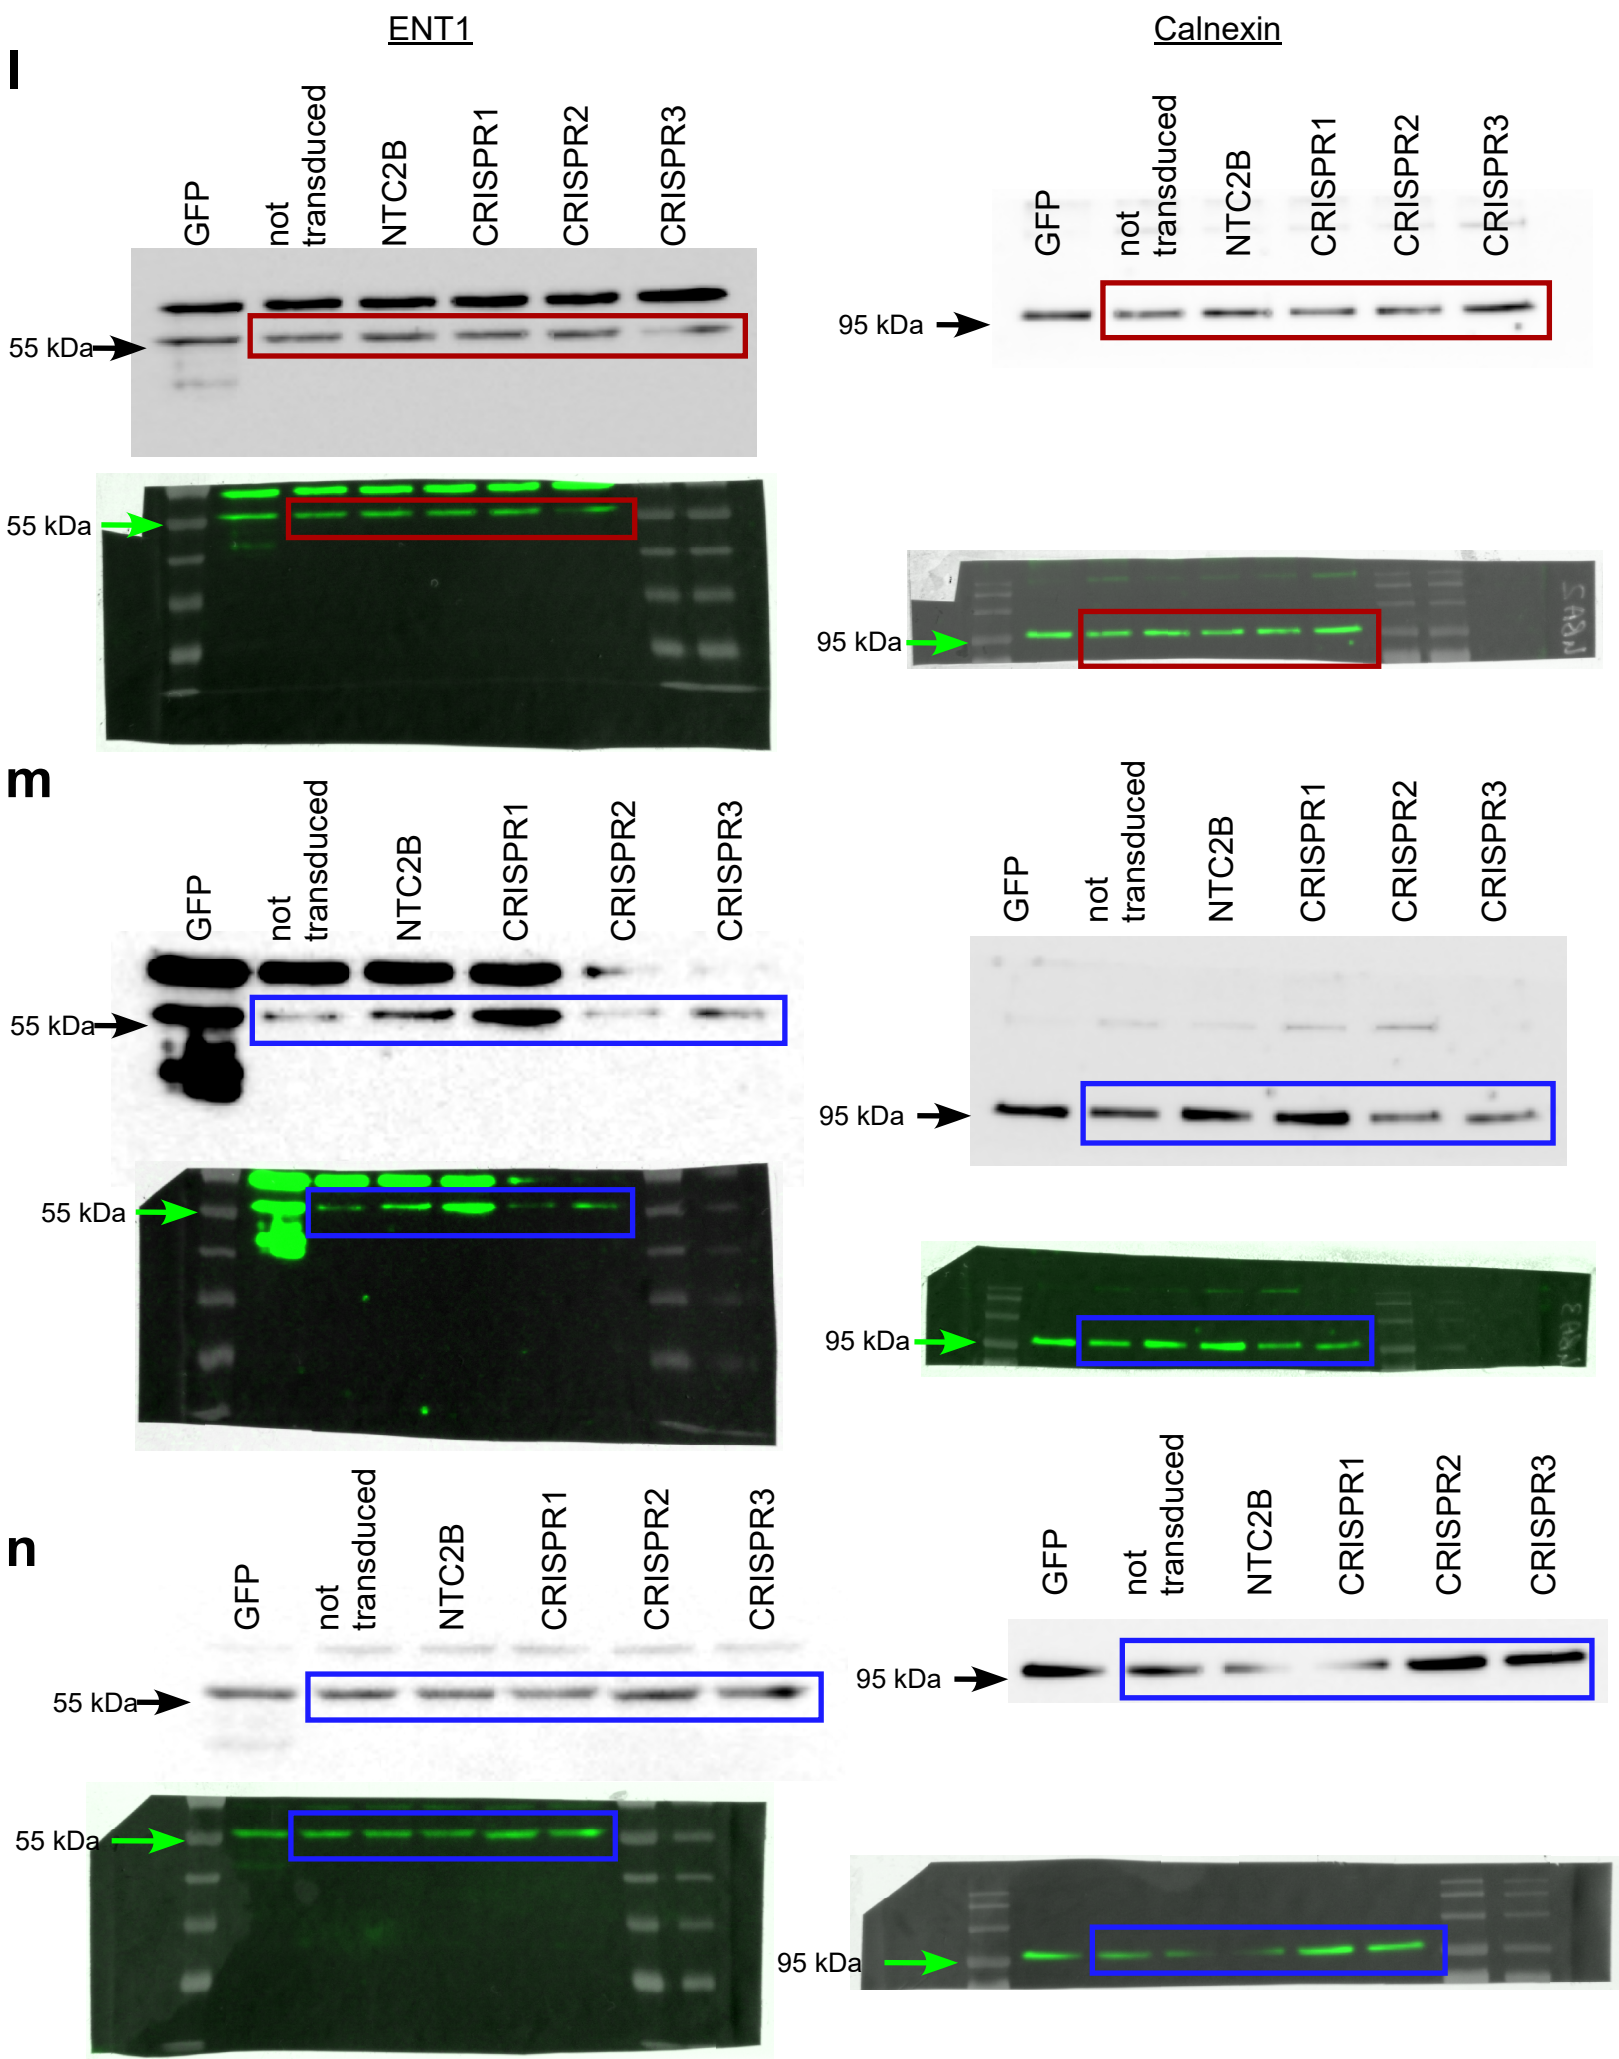

## Supplementary Information

**a-c** Uncropped immunoblots of Extended Data Fig. 2e: P-p38 (left) and Calnexin (right), respectively. **d-f** Uncropped immunoblots of Extended Data Fig. 2f: P-ATF2 (left) and Calnexin (right), respectively. **g-i** Uncropped immunoblots of Extended Data Fig. 2g: P-Creb (left) and Calnexin (right), respectively. **j, k** Uncropped immunoblots of Extended Data Fig. 3d: **j** Calnexin (top band) and UCP1 (bottom band), **k** UCP1 (left) and Calnexin (right). **l-n** Uncropped immunoblots of Extended Data Fig. 6d and merged pictures of the immunoblots and respective molecular weight markers: ENT1 (left) and Calnexin (right), respectively.

All samples framed in red are represented in the original figure and were quantified. All samples framed in blue were quantified.
