# Supplementary material for: Apoptotic brown adipocytes enhance energy expenditure via extracellular inosine
Source: Springer Nature journal article supplement (doi:10.1038/s41586-022-05041-0), 2022-07-05
Supplement: 41586_2022_5041_MOESM4_ESM.pdf [file 41586_2022_5041_MOESM4_ESM.pdf]

*Supplementary Table 1 List of murine primer sequences*

| <b>Target</b>   | <b>Forward (5' - 3')</b>      | <b>Reverse (5' - 3')</b>  |
|-----------------|-------------------------------|---------------------------|
| <b>Ada</b>      | GCGGTTGTTTCGCTTCAAGA          | GAGGAAGCTTGACTTCGCTG      |
| <b>Adipoq</b>   | GCCGTTCTTTCACCTACGA           | CATACACCTGGAGCCAGACTT     |
| <b>Cox8b</b>    | GAACCATGAAGCCAACGACT          | GCGAAGTTCACAGTGGTTCC      |
| <b>Entpd1</b>   | ACGGACCTGGAAGAATTGGA          | GTACAGGTTGGTGTGAGATGAC    |
| <b>Fabp4</b>    | GCGTGGAATTCGATGAAATCA         | CCCGCCATCTAGGGTTATGA      |
| <b>Hprt</b>     | GTCCCAGCGTCGTGATTAGC          | TCATGACATCTCGAGCAAGTCTTT  |
| <b>Nd5</b>      | AGCATTTCGGAAGCATCTTTG         | TTGTGAGGACTGGAATGCTG      |
| <b>Ndufa1</b>   | AGACGCATCTCTGGTGTCAA          | GCCAGGAAAATGCTTCCTTA      |
| <b>Necdin</b>   | CACTTCCTCTGCTGGTCTCC          | ATCGCTGTCTGTCATCTCAC      |
| <b>Nt5e</b>     | AAGCTATCTGGCCAACGGT           | GCTGCAGAGAACTTGATCCG      |
| <b>Pnp</b>      | CACCTACGTGATGTTGGCAG          | CCATGTGATTGGCCTTCTCC      |
| <b>Pparg</b>    | ACAAGACTACCCTTTACTGAAATTACCAT | TGCGAGTGGTCTTCCATCAC      |
| <b>Ppargc1a</b> | GCACACACCGCAATTCTCCCTTGT      | ACGCTGTCCCATGAGGTATTGACCA |
| <b>Prdm16</b>   | AGACCGAAGACGGCATCCT           | CGTAGCTCGAAGTCTGGTGG      |
| <b>Slc29a1</b>  | AGTCACCAGCCTCAGGACAG          | GGACACGTCCAGGCGGTT        |
| <b>Ucp1</b>     | GGCCTCTAGGACTCAGTC            | TAAGCCGGCTGAGATCTTGT      |
| <b>Xo</b>       | GGACAACGGTAGATGAGTTGG         | GAAGGCGGTCATACTTGGAG      |

*Supplementary Table 2 List of human primer sequences*

| <b>Target</b>   | <b>Forward (5' - 3')</b>  | <b>Reverse (5' - 3')</b> |
|-----------------|---------------------------|--------------------------|
| <b>ADA</b>      | GGTCCATCCTGTGCTGCAT       | TGGACAGTACGGTGAATGCC     |
| <b>ENTPD1</b>   | GAGGAAGGTGCCTATGGCTG      | GTCCTTGCCATAGAGGGCAA     |
| <b>FABP4</b>    | TCAAGAGCACCATAACCTTAGATGG | GACGCATTCCACCACAGTT      |
| <b>HPRT</b>     | CCTGGCGTCGTGATTAGTGA      | CGAGCAAGACGTTCAATCCT     |
| <b>NT5E</b>     | GAACCTGGCTGCTGTATTGC      | TACACCACATGGATTCCGCC     |
| <b>PNP</b>      | TACGACCGGACTATGAGGCA      | TGTACTCATGCCAACAGCGT     |
| <b>PPARG</b>    | ACAATGCTGGCCTCCTTGAT      | TTGCCAAGTCGCTGTCATCT     |
| <b>PPARGC1A</b> | TACTTCAGCGAGAAGCAGGC      | TCACTGCACCACTTGAGTCC     |
| <b>PRDM16</b>   | TACTGACGGACGTGGAAGTG      | GTGAGGTTCTGGTCATCGCA     |
| <b>TFAM</b>     | AGAACAGCTAACTCCAAGTCAGA   | ACGTTATAAGCTGAACGAGGCT   |
| <b>UCP1</b>     | GGAACAATCACCGCTGTGGT      | ATCCTGAGAGAGGGCGGAGCT    |
| <b>XO</b>       | CCGTCTATGCGGCTTGCA        | TGATCTCCTGTTAGGCAGTCG    |

*Supplementary Table 3 List of TaqMan assays*

|                              |               |               |
|------------------------------|---------------|---------------|
| TaqMan assay for Casp3       | Thermo Fisher | Mm00438045_m1 |
| TaqMan assay for Casp7       | Thermo Fisher | Mm00432322_m1 |
| TaqMan assay for Bcl2        | Thermo Fisher | Mm00477631_m1 |
| TaqMan assay for Ddit3       | Thermo Fisher | Mm00492097_m1 |
| TaqMan assay for mXbp1SV_AbD | Thermo Fisher | MXBP1SV-SV    |
| TaqMan assay for Bax         | Thermo Fisher | Mm00432050_m1 |
| TaqMan assay for 36b4        | Thermo Fisher | Mm01974474_gH |
